# Supplementary material for: Prehospital risk stratification in patients with chest pain
Source: PubMed Central journal article supplement (PMC8551969; doi:10.1136/emermed-2020-210212), 2021-08-09
Supplement: emermed-2020-210212supp001.pdf [file emermed-2020-210212supp001.pdf]

# Pre-hospital risk stratification in patients with chest pain

## ONLINE SUPPLEMENTARY MATERIAL

Figure S1 The HEART score

### HEART

| HEART score for chest pain patients |                                                         |   |
|-------------------------------------|---------------------------------------------------------|---|
| History                             | Highly suspicious                                       | 2 |
|                                     | Moderately suspicious                                   | 1 |
|                                     | Slightly suspicious                                     | 0 |
| ECG                                 | Significant ST-deviation                                | 2 |
|                                     | Non specific repolarisation disturbance / LBTB / PM     | 1 |
|                                     | Normal                                                  | 0 |
| Age                                 | ≥ 65 years                                              | 2 |
|                                     | > 45 and < 65 years                                     | 1 |
|                                     | ≤ 45 years                                              | 0 |
| Risk factors                        | ≥ 3 risk factors or history of atherosclerotic disease* | 2 |
|                                     | 1 or 2 risk factors                                     | 1 |
|                                     | No risk factors known                                   | 0 |
| Troponin                            | ≥ 3x normal limit                                       | 2 |
|                                     | > 1 and < 3x normal limit                               | 1 |
|                                     | ≤ 1x normal limit                                       | 0 |
| <b>Total</b>                        |                                                         |   |

\*Risk factors for atherosclerotic disease:

|                      |                         |
|----------------------|-------------------------|
| Hypercholesterolemia | Cigarette smoking       |
| Hypertension         | Positive family history |
| Diabetes Mellitus    | Obesity                 |

**Table S1.** Baseline characteristics of the 2027 patients with all-cause mortality.

|                                    | N = 2027    |
|------------------------------------|-------------|
| <b>Variable</b>                    |             |
| Age years (SD)                     | 65.2 ± 14.3 |
| Male sex (%)                       | 1057 (52.1) |
| HR bpm (SD)                        | 92 ± 19     |
| Systolic blood pressure mmhg (SD)  | 154.7± 29.8 |
| Diastolic blood pressure mmhg (SD) | 89.3 ± 18.9 |
| Event-time-to-troponin hrs. (SD)   | 3.8 ± 5.2   |
| HEART score median (IQR)           | 4 (3)       |
| HISTORY score 0 (%)                | 928 (45.0)  |
| HISTORY score 1 (%)                | 667 (32.4)  |
| HISTORY score 2 (%)                | 465 (22.6)  |
| ECG score 0 (%)                    | 924 (44.9)  |
| ECG score 1 (%)                    | 855 (41.5)  |
| ECG score 2 (%)                    | 281 (13.6)  |
| AGE score 0 (%)                    | 159 (7.7)   |
| AGE score 1 (%)                    | 773 (37.5)  |
| AGE score 2 (%)                    | 1128 (54.8) |
| RISK score 0 (%)                   | 273 (13.3)  |
| RISK score 1 (%)                   | 674 (32.7)  |
| RISK score 2 (%)                   | 1113 (54.0) |

**Abbreviations:** BP, blood pressure; HR, heart rate;

Figure S2:

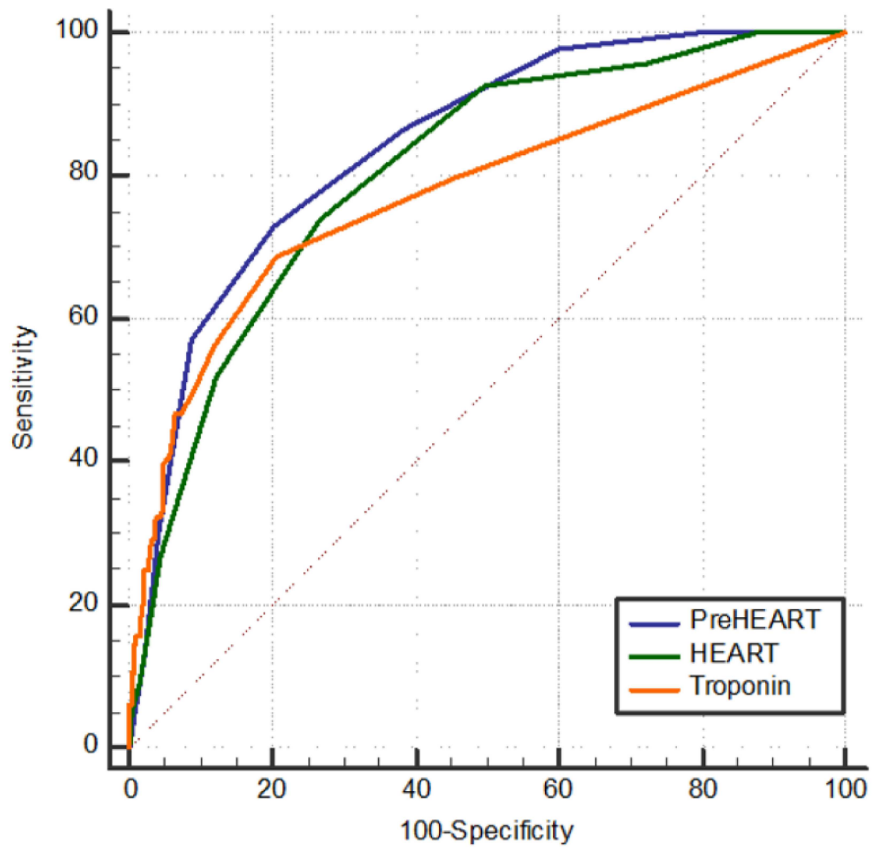

**Table S2.** PreHEART score development

|                        | <i>OR</i> | <i>95% CIs</i> | <i>p-value</i> | <i>OR</i> | <i>95% CIs</i> | <i>p-value</i> |
|------------------------|-----------|----------------|----------------|-----------|----------------|----------------|
| <b>Variables</b>       |           |                |                |           |                |                |
| History                | 2.08      | 1.46-2.97      | 0.00           | 2.02      | 1.52-2.69      | 0.00           |
| ECG                    | 1.32      | 0.91-1.92      | 0.15           | 1.57      | 1.15-2.14      | 0.00           |
| Age (optimized)        | 1.98      | 0.90-4.34      | 0.09           | 2.33      | 1.54-3.54      | 0.00           |
| Troponin (optimized)   | 2.68      | 1.24-5.79      | 0.01           | 2.80      | 1.26-3.53      | 0.00           |
| Male sex               | 1.51      | 1.12-2.05      | 0.01           | 1.59      | 1.26           | 0.00           |
| Heart rate             | 0.99      | 0.97-1.00      | 0.12           | ..        | ..             | ..             |
| Systolic BP            | 1.00      | 0.99-1.02      | 0.68           | ..        | ..             | ..             |
| Diastolic BP           | 1.01      | 0.99-1.03      | 0.56           | ..        | ..             | ..             |
| Event-to-troponin-time | 1.00      | 1.00-1.00      | 0.77           | ..        | ..             | ..             |

**Abbreviations:** *OR*, odds ratio; *CI*s, confidence intervals; *BP*, blood pressure

**Table S3.** Risk stratification and performance of the optimized preHEART score

|                       | <i>No MACE</i>    | <i>MACE</i>           | <i>Total</i>          |
|-----------------------|-------------------|-----------------------|-----------------------|
| <b>Risk category</b>  |                   |                       |                       |
| Low risk (n)          | 455 (99.3%)       | 3 (0.7%)              | 458 (37.9%)           |
| Intermediate risk (n) | 588 (88.2%)       | 79 (11.8%)            | 667 (55.2%)           |
| High risk (n)         | 42 (50.6%)        | 41 (49.4%)            | 83 (6.9%)             |
| <b>Performance</b>    | <b><i>AUC</i></b> | <b><i>95% CIs</i></b> | <b><i>p-value</i></b> |
| PreHEART score        | 0.85              | 0.82-0.88             | <0.01                 |

**Abbreviations:** *AUC*, area under the curve; *MACE*, major adverse cardiac events; *CI*s, confidence intervals

**Table S4.** Performance (in AUCs) of the HEART and preHEART scores considering the secondary endpoints, mortality at 7 and 30 days after first medical contact.

| Death at 7 days  | Index Cohort | CI 95%    | Validation Cohort | CI 95%    |
|------------------|--------------|-----------|-------------------|-----------|
| HEART            | 0.81         | 0.79-0.83 | 0.81              | 0.77-0.85 |
| preHEART         | 0.85         | 0.85-0.87 | 0.83              | 0.79-0.87 |
| Death at 30 days | Index Cohort | CI 95%    | Validation Cohort | CI 95%    |
| HEART            | 0.80         | 0.78-0.82 | 0.82              | 0.78-0.85 |
| preHEART         | 0.84         | 0.82-0.86 | 0.84              | 0.80-0.87 |

**Abbreviations:** *CI*, confidence interval.

**Table S5** Distribution of patients across the HEART and preHEART scores in the index and validation cohorts

|                                | Index Cohort<br>N=1208 | Validation Cohort<br>N=435 |
|--------------------------------|------------------------|----------------------------|
| HEART score, median (IQR)      | 5 (3)                  | 5 (3)                      |
| HEART low-risk (%)             | 320 (26.5)             | 123 (28.3)                 |
| HEART intermediate-risk (%)    | 699 (57.9)             | 234 (53.8)                 |
| HEART high-risk (%)            | 189 (15.6)             | 78 (17.9)                  |
| preHEART score, median (IQR)   | 4 (2)                  | 4 (2)                      |
| preHEART low-risk (%)          | 458 (37.9)             | 160 (36.8)                 |
| preHEART intermediate-risk (%) | 668 (55.3)             | 247 (56.8)                 |
| preHEART high-risk (%)         | 82 (6.8)               | 28 (6.4)                   |

**Abbreviations:** *IQR*: interquartile range
